# Supplementary material for: Five Novel Genes Related to the Pathogenesis and Progression of Pancreatic Neuroendocrine Tumors by Bioinformatics Analysis With RT-qPCR Verification
Source: PubMed Central journal article supplement (PMC6771308; doi:10.3389/fnins.2019.00937), 2019-09-24

## Supplementary Material 2: Dissolution Curve of RT-qPCR Experimental Genes.

### GAPDH

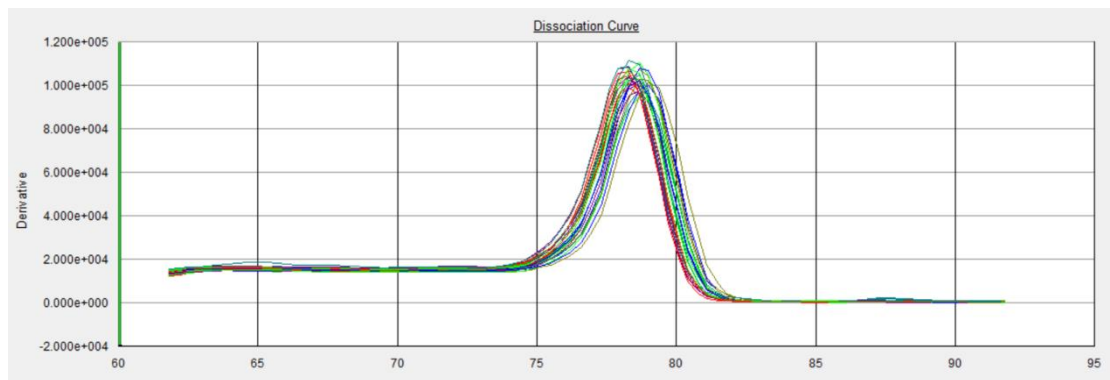

### KLKB1

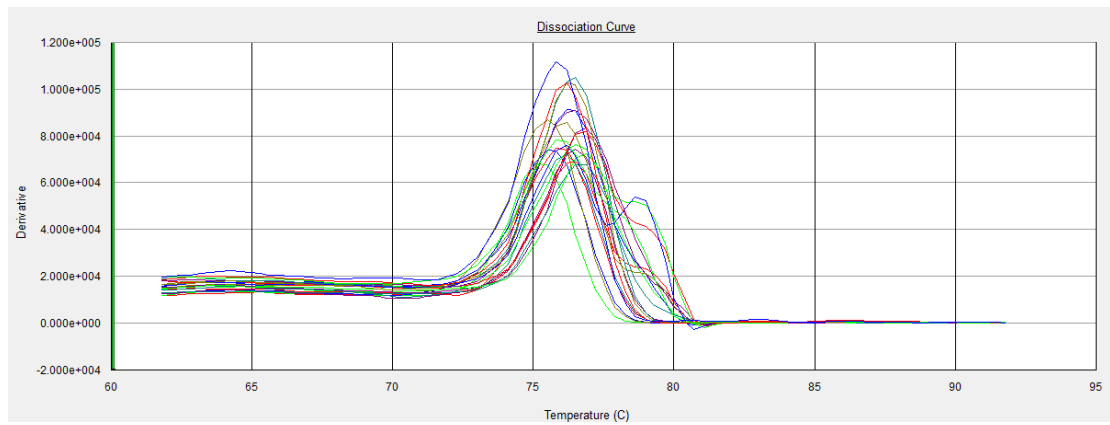

### IL13RA2

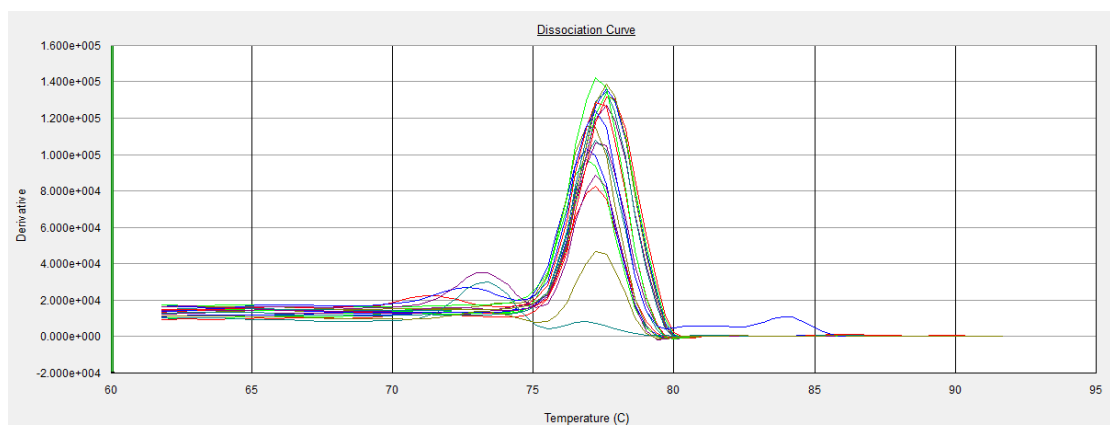

### PCSK2

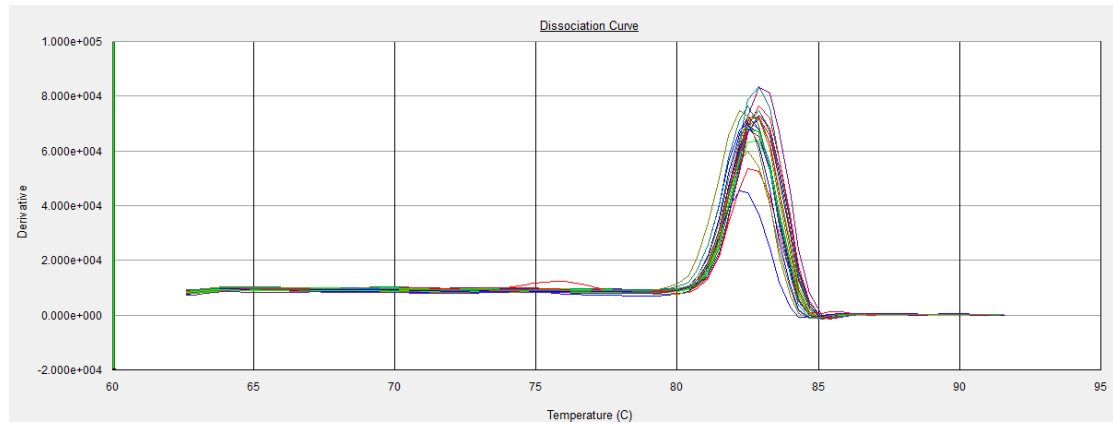

### ABCC8

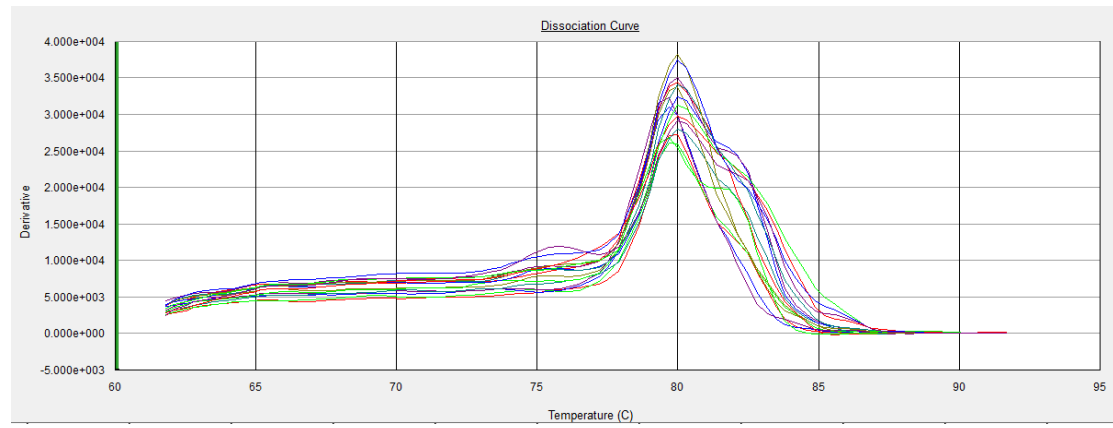

### PART1

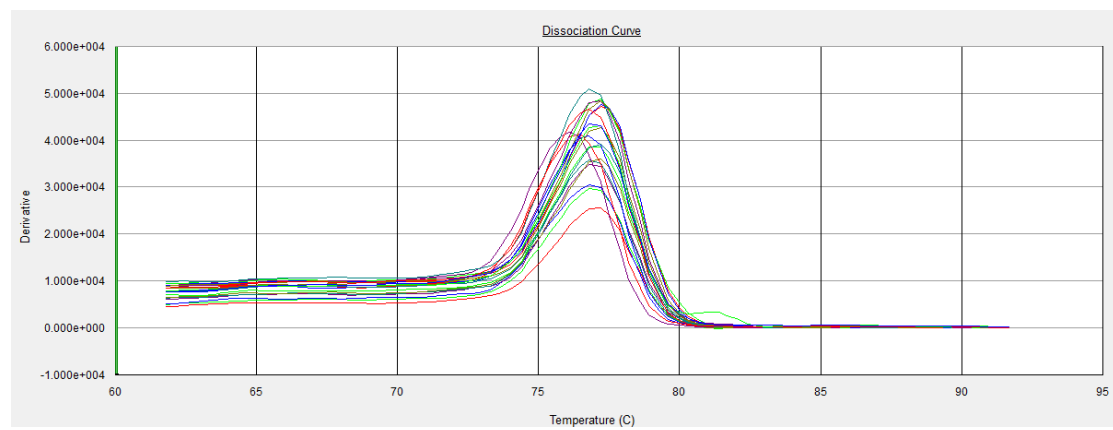

Supplement: Image_1.pdf [file Image_1.pdf]
